# Supplementary material for: Scanning the optical properties of 4-(1,1-difluoro-1H-1λ4,10λ4-benzo[4,5]thiazolo[3,2-c][1,3,2]oxazaborinin-3-yl)-N,N-diphenylaniline in mono-disperse and aggregation systems
Source: Royal Society of Chemistry journal article supplement (doi:10.1039/d1tc02838c), 2021-01-01
Supplement: d1tc02838c1.pdf [file d1tc02838c1.pdf]

Supporting Information

**Scanning the Optical Properties of 4-(1,1-difluoro-1H-1λ<sup>4</sup>,10λ<sup>4</sup>-benzo[4,5]thiazolo[3,2-c][1,3,2]oxazaborinin-3-yl)-N,N-diphenylaniline in Mono-disperse and Aggregation System**

Xiujun Gao<sup>1</sup>, Ning Sui<sup>1</sup>, Quan Wang<sup>1</sup>, Lingyun Pan<sup>1</sup>, Xiaochun Chi<sup>1\*</sup>, Hanzhuang Zhang<sup>1</sup>, Ran Lu<sup>2\*</sup>, Zhihui Kang<sup>1</sup>, and Yinghui Wang<sup>1\*</sup>

<sup>1</sup>Femtosecond Laser laboratory, Key Laboratory of Physics and Technology for Advanced Batteries, College of Physics, Jilin University, Changchun 130012, P. R. China.

<sup>2</sup>College of Chemistry, Jilin University, Changchun 130012, P. R. China.

\* The correspondence should be sent to E-mail: chixc@jlu.edu.cn, luran@mail.jlu.edu.cn and yinghui\_wang@jlu.edu.cn

**Note S1. Calculation Details of nonlinear absorption coefficient ( $\beta$ ) and the two-photon absorption cross section ( $\sigma$ ).**

The influence of the solvent nonlinearity could be excluded. The two-photon absorption (TPA) coefficient  $\beta$  of TOND in three solvents can be obtained by fitting the experimental results with equation:<sup>1-2</sup>

$$T(z, S = 1) = \sum_{m=0}^{\infty} \frac{[-q_0(z, 0)]^m}{(m + 1)^{3/2}}$$

where  $q_0(z) = \beta I_0 / (1 + z^2/z_0^2)$ ;  $z_0 = k\omega_0^2/2$  is the Rayleigh length,  $k = 2\pi/\lambda$  is the wave vector,  $\omega_0$  is beam waist radius of Gaussian pulse, and  $I_0$  is the pulse irradiance. The TPA coefficient  $\beta$  is related to the TPA cross section  $\sigma$  by using<sup>3</sup>

$$\sigma = \frac{\beta h \nu 10^3}{N c}$$

where  $N$  is Avogadro's number,  $c$  is the concentration,  $h$  is Planck's constant, and  $\nu$  is the laser frequency. In this experiment, the concentration of TOND is  $5 \times 10^{-4} \text{ M}$ .  $\sigma$  is expressed in Göppert-Mayer units (GM), with  $1 \text{ GM} = 1 \times 10^{-50} \text{ cm}^4 \text{ s molecule}^{-1} \text{ photon}^{-1}$ .

**Note S2. Calculation Details of Temperature-Dependent PL Quantum Yield.**

The PL quantum yield can be defined as the ratio of the number of emitted photons to the number of absorbed photons by a luminescent material:<sup>4</sup>

$$QY = \frac{N_{em}}{N_{abs}}$$

The most straightforward method for the determination of QY values presents the absolute measurement of  $N_{abs}$  and  $N_{em}$  with an integrating sphere setup. The QY of BTTM film at room temperature can be described by:<sup>5</sup>

$$QY = \frac{\int \frac{\lambda}{hc} [I_{em}^{sample}(\lambda) - I_{em}(\lambda)] d\lambda}{\int \frac{\lambda}{hc} [I_{ex}(\lambda) - I_{ex}^{sample}(\lambda)] d\lambda}$$

and  $\lambda$  is the wavelength,  $h$  is Planck's constant,  $c$  is the velocity of light,  $I_{ex}^{sample}$  and  $I_{ex}$  are the integrated intensities of the excitation light with and without a sample respectively,  $I_{em}^{sample}$  and  $I_{em}$  are the integrated intensities of PL intensities with and without a sample, respectively.

After obtaining the temperature-dependent absorption and PL spectra of the sample, the quantum yield at different temperatures  $QY_2$  can be obtained from  $QY_1$ . The general equation used in the determination of relative quantum yields is given in<sup>6</sup>

$$\frac{QY_2}{QY_1} = \frac{I_{em2}}{I_{em1}} \times \frac{A_1}{A_2} \times \frac{\lambda_{ex1}}{\lambda_{ex2}} \times \frac{\eta_2}{\eta_1}$$

Among them,  $I_{em}$  is the integrated area under the corrected emission spectrum;  $A$  is absorbance at the excitation wavelength;  $\lambda_{ex}$  is the excitation wavelength;  $\eta$  is the collection efficiency of the system. In our experiments, the system and test conditions are unchanged, which means that  $\frac{\eta_2}{\eta_1} \approx 1$ , and the excitation wavelength remains the same. The final calculated PL quantum yields at different temperatures are shown in the Table S2.

### **Note S3. Derivation of Radiative Lifetimes from Measured PL Dynamics<sup>7</sup>**

The PL dynamics can be accurately fitted to the sum of three exponentials, by combining the fitting results with the PL QYs, meanwhile the radiative time constants are calculated. This procedure is illustrated in Fig. 6, for which the measured PL dynamics are decomposed into the two individual exponential components  $u(t_i)$  ( $i = 1$  or 2).

The PL decay can be described by:

$$I_{PL}(t) = \sum_{i=1}^n k_i \exp(-t/\tau_X^i),$$

where  $\tau_X^i$  is the effective lifetime given by:

$$\tau_X^i = \tau_{r,X} \tau_{nr,X}^i / (\tau_{r,X} + \tau_{nr,X}^i),$$

and  $k_i$  is the relative fraction of the TOND in the  $i$ -th sub-ensemble; the  $k_i$  coefficients are normalized such as  $\sum_{i=1}^n k_i = 1$ .

The PL quantum yield (QY) of the individual sub-ensemble is given by:

$$q_i = \tau_X^i / \tau_{r,X},$$

And the total PL QY of the entire QD sample(Q) can be expressed as:

$$Q = \sum_{i=1}^n k_i q_i = \tau_{r,X}^{-1} \sum_{i=1}^n k_i \tau_X^i,$$

This leads to the following expression for the radiative lifetime:

$$\tau_{r,X} = Q^{-1} \sum_{i=1}^n k_i \tau_X^i = Q^{-1} \langle \tau_X \rangle,$$

Where  $\langle \tau_X \rangle$ , is the average lifetime in the TOND ensemble expressed as:

$$\langle \tau_X \rangle = \sum_{i=1}^n k_i \tau_X^i$$

Table S1. Absorption peak, PL maximum peak and PL quantum yield of TOND in three solvents.

| Solvent | Absorption peak /nm | PL maximum peak /nm | PL QY |
|---------|---------------------|---------------------|-------|
| TOL     | 437, 449            | 505                 | 0.5   |
| THF     | 437                 | 535                 | 0.44  |
| DMF     | 445                 | 582                 | 0.07  |

Table S2: Fitting parameters and calculation results of PL dynamics of TOND film.

| T/K | $k_1$ | $\tau_1/\text{ns}$ | $k_2$ | $\tau_2/\text{ns}$ | Average<br>lifetime/ns | Radiative<br>lifetime/ns | PL QY |
|-----|-------|--------------------|-------|--------------------|------------------------|--------------------------|-------|
| 295 | 0.80  | 1.99               | 0.20  | 7.91               | 3.17                   | 35.27                    | 0.09  |
| 255 | 0.78  | 2.11               | 0.22  | 7.54               | 3.31                   | 25.38                    | 0.13  |
| 215 | 0.75  | 2.48               | 0.25  | 7.53               | 3.74                   | 15.13                    | 0.23  |
| 195 | 0.744 | 2.62               | 0.266 | 7.49               | 3.94                   | 12.71                    | 0.31  |
| 175 | 0.74  | 3.03               | 0.26  | 9.01               | 4.58                   | 11.34                    | 0.41  |
| 155 | 0.73  | 3.36               | 0.27  | 9.81               | 5.10                   | 9.81                     | 0.52  |
| 135 | 0.72  | 3.87               | 0.28  | 11.77              | 6.08                   | 9.53                     | 0.64  |
| 115 | 0.7   | 4.08               | 0.3   | 11.96              | 6.44                   | 8.51                     | 0.76  |
| 95  | 0.64  | 4.22               | 0.36  | 12.25              | 7.11                   | 8.46                     | 0.84  |
| 77  | 0.62  | 4.54               | 0.38  | 13.48              | 7.94                   | 8.32                     | 0.92  |

Fig. S1 Two-photon fluorescence (TPF) spectra of TOND in THF (A) and DMF (B).

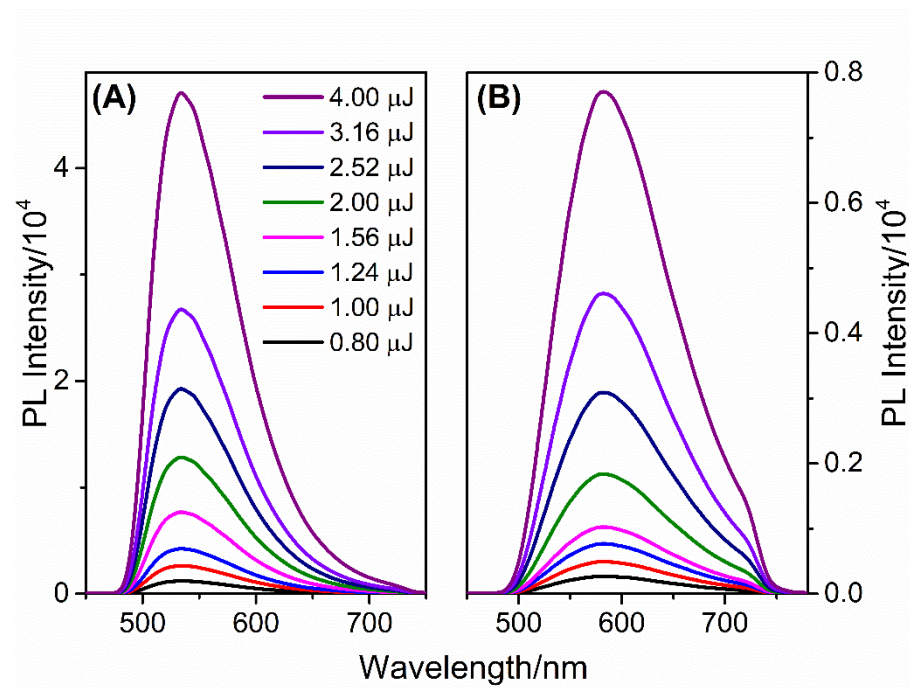

Fig. S2 Spectra of pump, probe and dump pulses are plotted with same wavelength scale below the absorption and PL spectra.

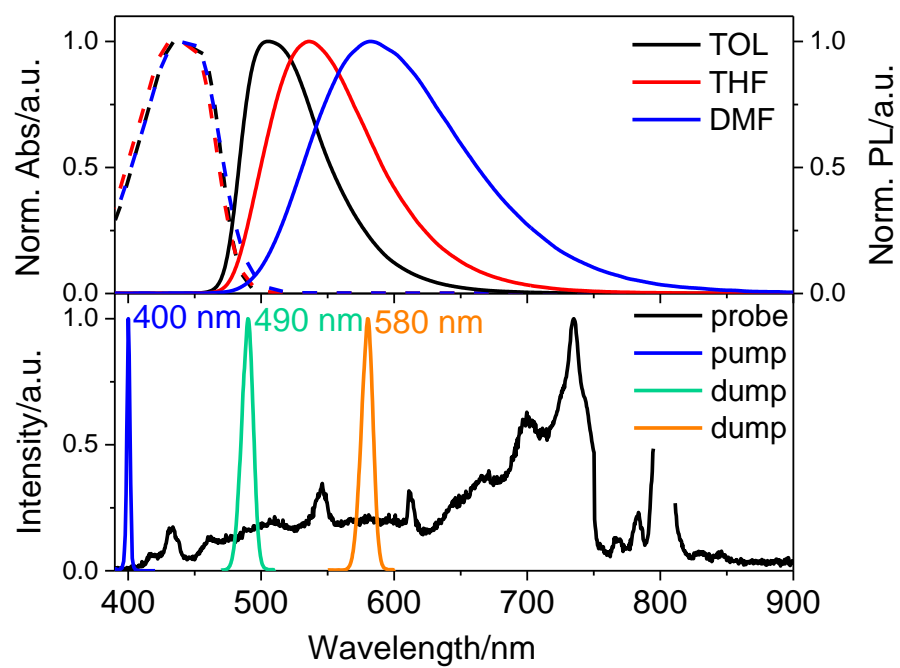

Fig. S3 Femtosecond time-resolved pump-probe spectra of TOND in TOL upon excitation at 400 nm. Inset shows the normalized absorption and PL spectra.

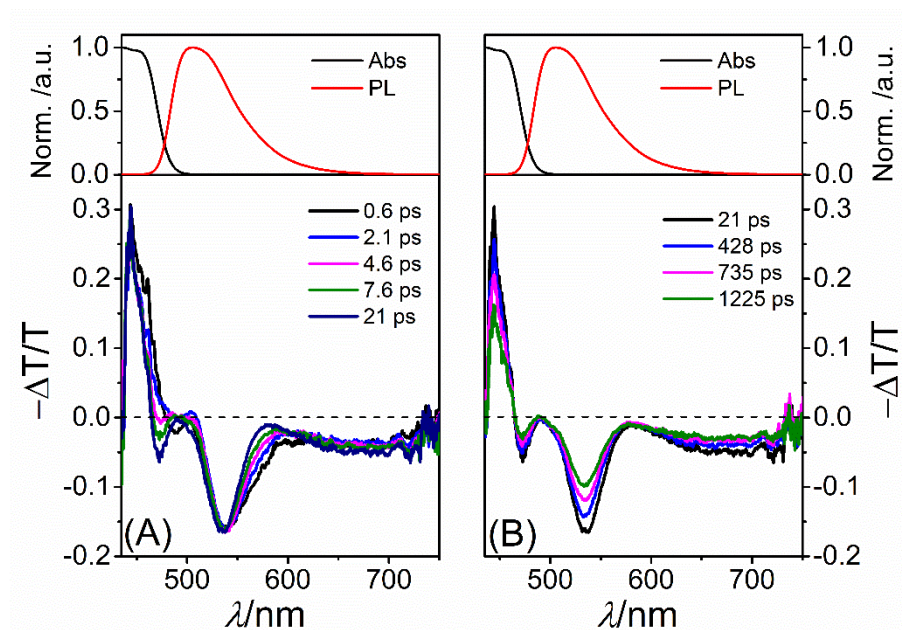

Fig. S4 Femtosecond time-resolved pump-probe spectra of TOND in THF. Inset shows the normalized absorption and PL spectra.

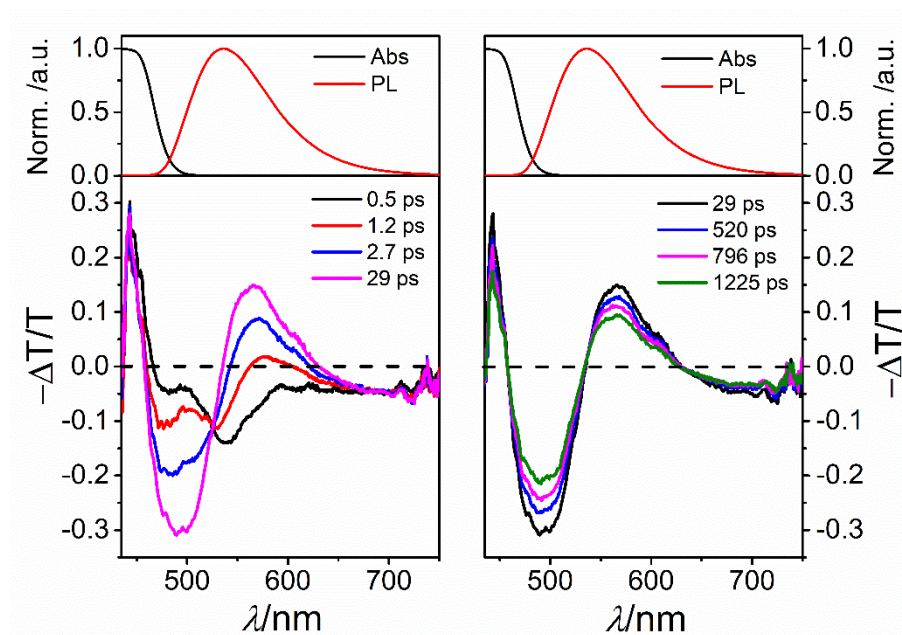

Fig. S5 Femtosecond time-resolved pump-probe spectra of TOND in DMF. Inset shows the normalized absorption and PL spectra.

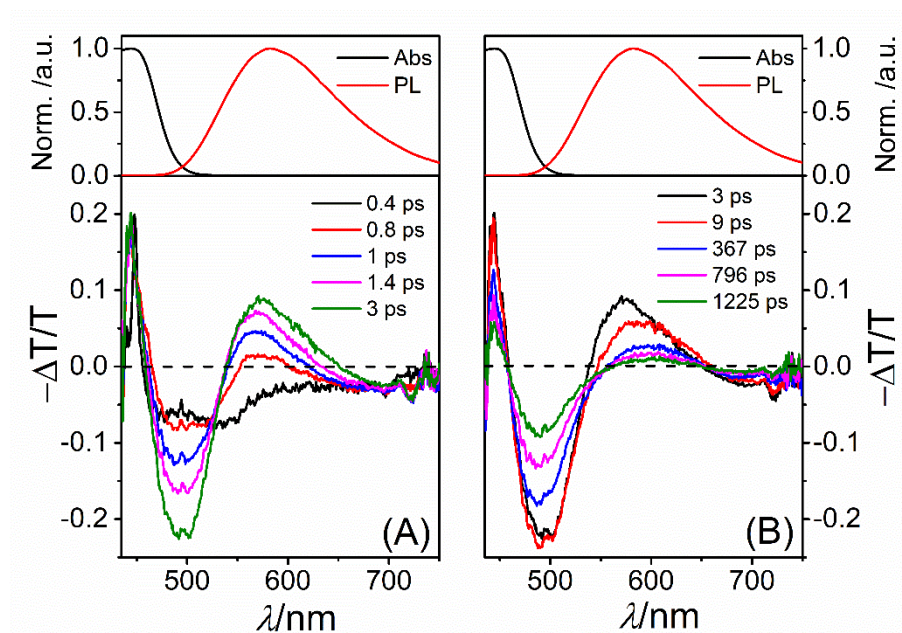

Fig. S6 Kinetics at selected wavelengths of TOND in (A) TOL, (B) THF, (C) DMF from femtosecond pump-probe spectra for showing the quality of global fitting.

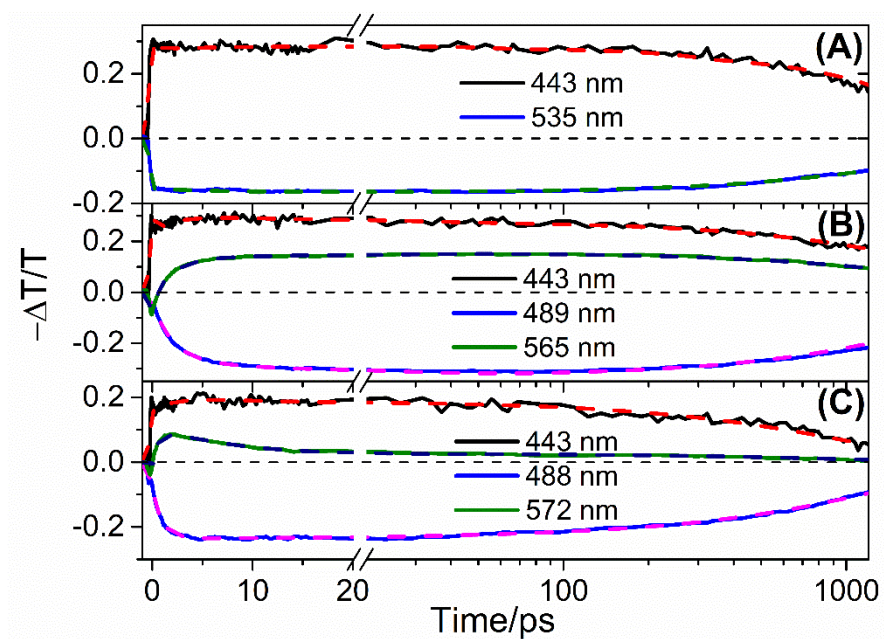

Fig. S7 Associated population evolution obtained from global analysis for TOND in TOL.

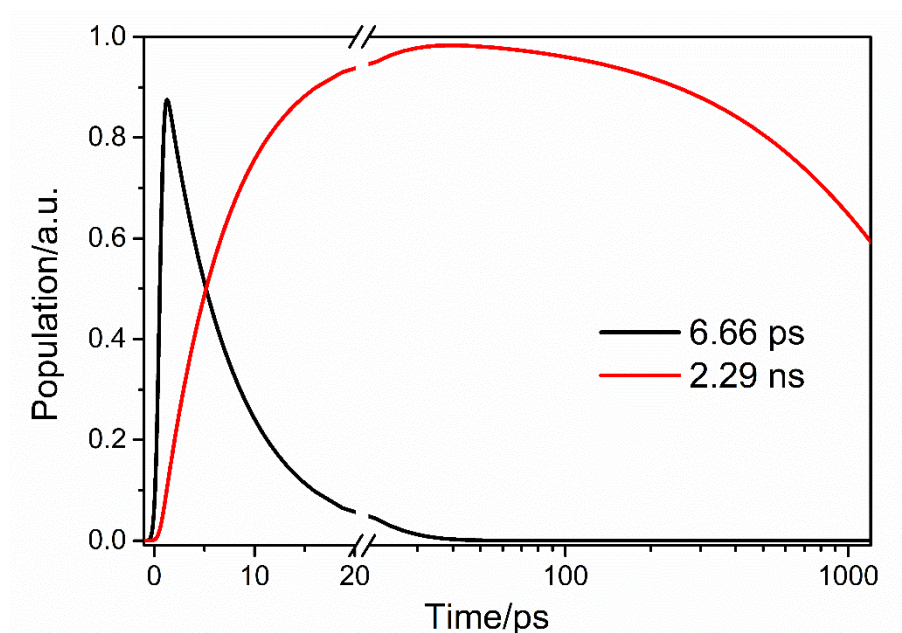

Fig. S8 Associated population evolution obtained from global analysis for TOND in THF.

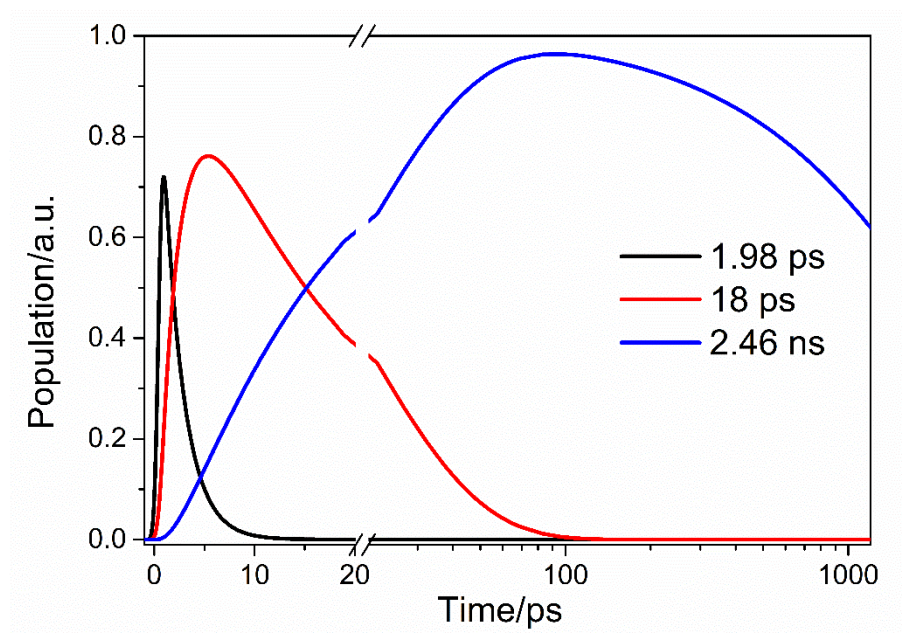

Fig. S9 Associated population evolution obtained from global analysis for TOND in DMF.

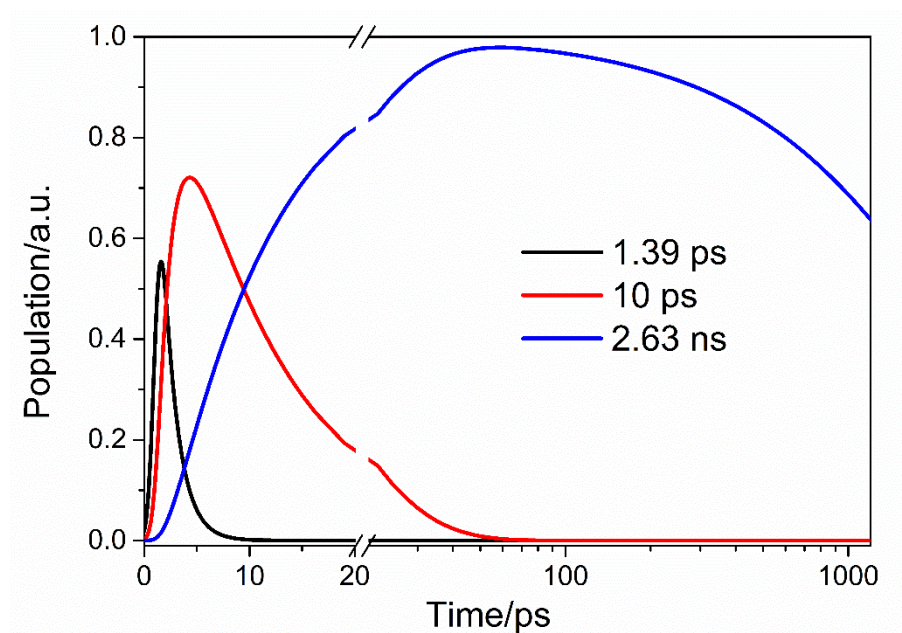

Fig. S10 Stimulated emission peak shift time correlation functions  $C(t)$  of TOND in DMF.

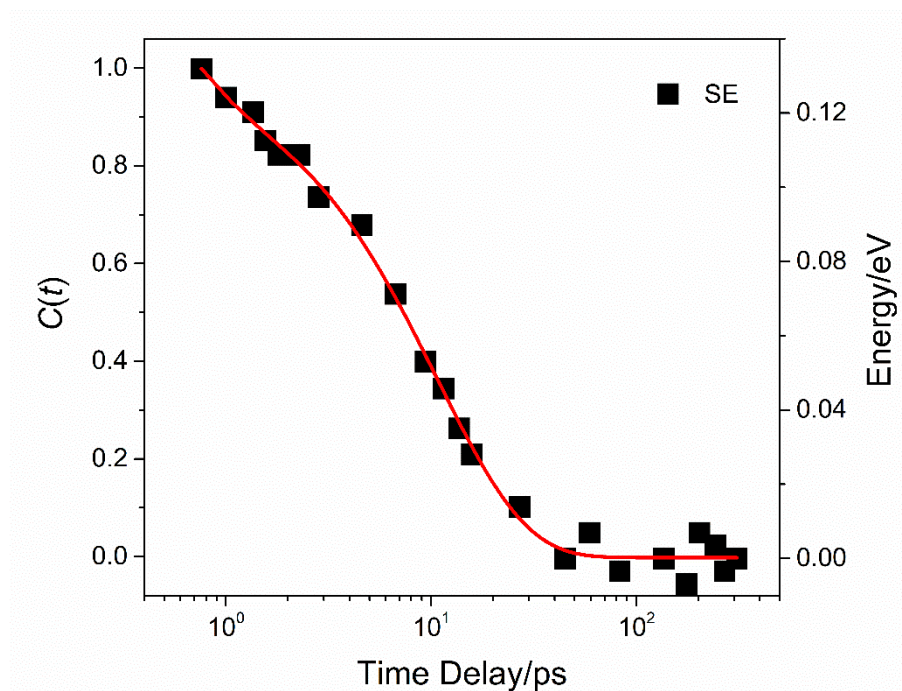

Fig. S11 Steady state absorption and PL spectra of TOND film at 295 K.

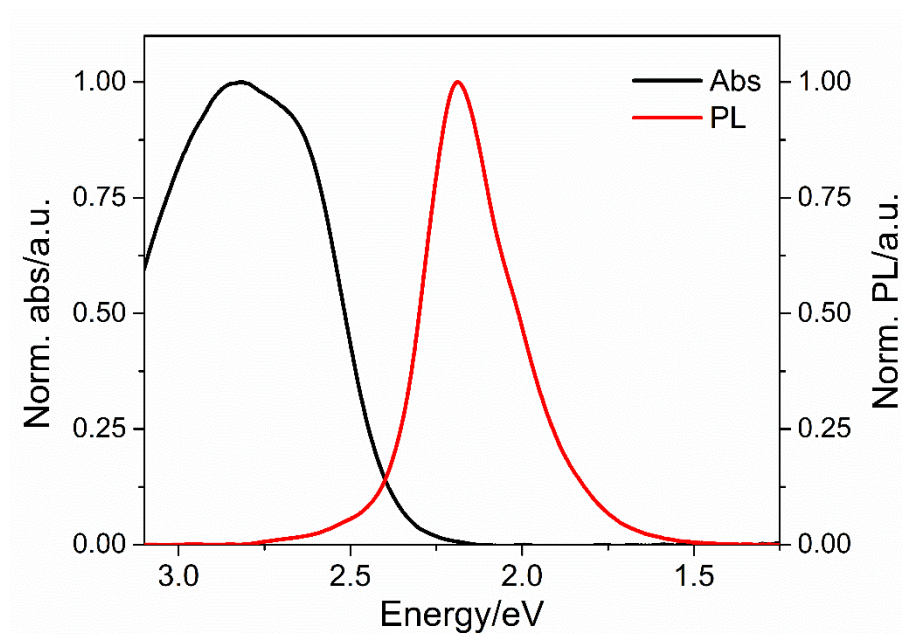

## Reference

- (1) Huang, T.-H., Yang, D., Kang, Z.-H., Miao, E.-L., Lu, R., Zhou, H.-P., Wang, F., Wang, G.-W., Cheng, P.-F., Wang, Y.-H., et al., *Opt. Mater.*, 2013, **35**, 467-471.
- (2) Sheik-Bahae, M. and Said, A. A., *IEEE J. Quantum Electron.*, 1990, **26**, 760-769.
- (3) Ho-Wu, R., Yau, S. H. and Goodson, T., *ACS Nano*, 2016, **10**, 562-572.
- (4) Wurth, C., Grabolle, M., Pauli, J., Spieles, M. and Resch-Genger, U., *Anal. Chem.*, 2011, **83**, 3431-3439.
- (5) Suzuki, K., Kobayashi, A., Kaneko, S., Takehira, K., Yoshihara, T., Ishida, H., Shiina, Y., Oishi, S. and Tobita, S., *Phys. Chem. Chem. Phys.*, 2009, **11**, 9850-9860.
- (6) Velapoldi, R. A. and Tønnesen, H. H., *J. Fluoresc.*, 2004, **14**, 465-472.
- (7) Makarov, N. S., Guo, S. J., Isaienko, O., Liu, W. Y., Robel, I. and Klimov, V. I., *Nano Lett.*, 2016, **16**, 2349-2362.
